# Supplementary material for: Epigenetic disruption and glucose homeostasis changes following low-dose maternal bisphenol A exposure
Source: Royal Society of Chemistry journal article supplement (doi:10.1039/c6tx00047a), 2016-01-01
Supplement: c6tx00047a1.pdf [file c6tx00047a1.pdf]

Supporting Information for *Toxicology Research* manuscript TX-ART-01-2016-000047:

**Epigenetic disruption and glucose homeostasis changes following low-dose maternal  
bisphenol A exposure**

Huailong Chang, Danqi Wang, Wei Xia, Xinyun Pan, Wenqian Huo, Shunqing Xu\*,

Yuanyuan Li\*

\*Correspondence should be addressed to Dr. Yuanyuan Li (Tel: 86-27-83693417, Fax: 86-27-83657781, Email: liyuanyuan@hsut.edu.cn) or Dr. Shunqing Xu (Tel: 86-27-83657705, Fax: 86-27-83657781, Email: xust@hust.edu.cn) at 13 Hangkong Rd., Wuhan 430030, China.

### Supplementary Figure Legends

**Fig. S1** Alteration of glucose homeostasis and insulin sensitivity in rats perinatally exposed to BPA. Blood glucose levels (in mg/dl) (A, E) and area under the curve (AUC) (B, F) during glucose tolerance test, and blood glucose levels (in mg/dl) (C, G) and AUC (D, H) during the insulin tolerance test on BPA-exposed ( $\circ$ ) and control ( $\bullet$ ) male rats (upper 4 panels) and female rats (lower 4 panels) at the age of 4 weeks ( $n = 3-7$  rats in each group for all panels). Data are represented as mean  $\pm$  SEM.

**Fig. S2** Alteration of glucose homeostasis and insulin sensitivity in rats perinatally exposed to BPA. Blood glucose levels (in mg/dl) (A, E) and area under the curve (AUC) (B, F) during glucose tolerance test, and blood glucose levels (in mg/dl) (C, G) and AUC (D, H) during the insulin tolerance test on BPA-exposed ( $\circ$ ) and control ( $\bullet$ ) male rats (upper 4 panels) and female rats (lower 4 panels) at the age of 8 weeks ( $n = 5-9$  rats in each group for all panels). Data are represented as mean  $\pm$  SEM.  $**p < 0.01$  by repeated measure ANOVA.

**Fig. S3** Alteration of glucose homeostasis and insulin sensitivity in rats perinatally exposed to BPA. Blood glucose levels (in mg/dl) (A, E) and area under the curve (AUC) (B, F) during glucose tolerance test, and blood glucose levels (in mg/dl) (C, G) and AUC (D, H) during the insulin tolerance test on BPA-exposed ( $\circ$ ) and control ( $\bullet$ ) male rats (upper 4 panels) and female rats (lower 4 panels) at the age of 20 weeks ( $n = 4-10$  rats in each group for all panels). Data are represented as mean  $\pm$  SEM.  $*p \leq 0.05$ ,  $**p < 0.01$  by repeated measure ANOVA.
